# Supplementary material
Source: ML conference proceedings conference paper supplement (https://openreview.net/forum?id=39CEoMXTHh)
Supplement: supplementary_material [file BO_results.xlsx]

## Sheet: Sheet1
Nozzle_temp	Z_hop	Casting	Retraction_dist	OWW_dist	stringing
249	0.6	0.09	3	0.4	89.06
256	0.2	0.07	3	0.7	43.28
257	0.1	0.07	3	0.7	18.91
258	0	0.07	3	0.7	15.9
259	0	0.07	3	0.7	15.75
260	0	0.07	3	0.7	12.18
260	0	0.07	3	0.8	18.86
260	0	0.07	1	0.6	14.76
260	0	0.05	3	0.6	16.8
