# Supplementary material
Source: ML conference proceedings conference paper supplement (https://openreview.net/forum?id=39CEoMXTHh)
Supplement: supplementary_material [file LLAMBO-L_results.xlsx]

## Sheet: Sheet1
Nozzle_temp	Z_hop	Casting	Retraction_dist	OWW_dist	stringing
235	0.3	0.06	4	0.3	29.04
245	0.5	0.08	5	0.5	27.5
240	0.2	0.04	6	0.4	12.6
230	0.7	0.07	3	0.4	6.03
230	0.8	0.09	6	0.3	25.68
225	0.9	0.05	7	0.2	44.34
235	0.4	0.05	7	0.4	85
225	0.5	0.03	4	0.6	16
225	0.6	0.08	5	0.6	22.47
