# Supplementary material
Source: ML conference proceedings conference paper supplement (https://openreview.net/forum?id=39CEoMXTHh)
Supplement: supplementary_material [file LLAMBO_results.xlsx]

## Sheet: Sheet1
Nozzle_temp	Z_hop	Casting	Retraction_dist	OWW_dist	stringing
235	0.3	0.06	4	0.3	29.04
245	0.5	0.08	5	0.5	27.5
239	0.4	0.07	5	0.4	48.49
256	0.1	0.03	2	0	17.85
259	0.2	0.04	3	0.2	28.43
258	0.2	0.03	3	0.3	26.54
257	0.9	0.07	6	0.1	81
254	0.4	0.05	4	0.4	76
259	0.2	0.02	4	0.2	25.8
