# Supplementary material
Source: ML conference proceedings conference paper supplement (https://openreview.net/forum?id=39CEoMXTHh)
Supplement: supplementary_material [file TRAISIENT_results.xlsx]

## Sheet: Sheet1
Nozzle_temp	Z_hop	Casting	Retraction_dist	OWW_dist	stringing
235	0.3	0.06	4	0.3	29.04
245	0.5	0.08	5	0.5	27.5
230	0.4	0.07	6	0.4	23.61
222	0.5	0.08	9	0.4	6.66
220	0.6	0.09	9	0.5	4.75
220	0.7	0.1	10	0.2	12.06
220	0.7	0.07	10	0.7	11.05
220	0.6	0.07	10	0.8	8.79
220	0.3	0.1	10	0.7	0.97
